# Supplementary material
Source: publisher site journal article supplement (https://www.dovepress.com/article/supplementary_file/526511/526511%20Revised%20Supplementary%20Table%201.xlsx)
Supplement: Supplementary file 1 [file 526511%20Revised%20Supplementary%20Table%201.xlsx]

## Sheet: Sheet1
Supplementary Table 1. Characteristics of the 71 SNPs in Mendelian randomization analysis.
	exposure	outcome	id.exposure	id.outcome	samplesize	SNP	b	se	p	gene
1	Non-cancer illness code, self-reported: high cholesterol || id:ukb-b-10912	Non-cancer illness code self-reported: chronic obstructive airways disease/copd || id:ukb-a-67	ukb-b-10912	ukb-a-67	337159	rs10085881	-0.00529188	0.00252041	0.0357627	/
2	Non-cancer illness code, self-reported: high cholesterol || id:ukb-b-10912	Non-cancer illness code self-reported: chronic obstructive airways disease/copd || id:ukb-a-67	ukb-b-10912	ukb-a-67	337159	rs10096633	-0.00479755	0.00251934	0.0568722	/
3	Non-cancer illness code, self-reported: high cholesterol || id:ukb-b-10912	Non-cancer illness code self-reported: chronic obstructive airways disease/copd || id:ukb-a-67	ukb-b-10912	ukb-a-67	337159	rs10410835	-0.00531115	0.00252437	0.0353827	NECTIN2
4	Non-cancer illness code, self-reported: high cholesterol || id:ukb-b-10912	Non-cancer illness code self-reported: chronic obstructive airways disease/copd || id:ukb-a-67	ukb-b-10912	ukb-a-67	337159	rs1042725	-0.00509039	0.00251288	0.0427931	HMGA2
5	Non-cancer illness code, self-reported: high cholesterol || id:ukb-b-10912	Non-cancer illness code self-reported: chronic obstructive airways disease/copd || id:ukb-a-67	ukb-b-10912	ukb-a-67	337159	rs10468017	-0.00506347	0.00251865	0.0443897	/
6	Non-cancer illness code, self-reported: high cholesterol || id:ukb-b-10912	Non-cancer illness code self-reported: chronic obstructive airways disease/copd || id:ukb-a-67	ukb-b-10912	ukb-a-67	337159	rs10504255	-0.00546097	0.00251794	0.0300959	/
7	Non-cancer illness code, self-reported: high cholesterol || id:ukb-b-10912	Non-cancer illness code self-reported: chronic obstructive airways disease/copd || id:ukb-a-67	ukb-b-10912	ukb-a-67	337159	rs1081105	-0.00454941	0.00253584	0.0728056	APOE
8	Non-cancer illness code, self-reported: high cholesterol || id:ukb-b-10912	Non-cancer illness code self-reported: chronic obstructive airways disease/copd || id:ukb-a-67	ukb-b-10912	ukb-a-67	337159	rs112403212	-0.00534974	0.00251415	0.0333492	SCARB1
9	Non-cancer illness code, self-reported: high cholesterol || id:ukb-b-10912	Non-cancer illness code self-reported: chronic obstructive airways disease/copd || id:ukb-a-67	ukb-b-10912	ukb-a-67	337159	rs115187557	-0.0054187	0.0025143	0.0311495	BMPR2
10	Non-cancer illness code, self-reported: high cholesterol || id:ukb-b-10912	Non-cancer illness code self-reported: chronic obstructive airways disease/copd || id:ukb-a-67	ukb-b-10912	ukb-a-67	337159	rs11591147	-0.00533613	0.00256741	0.0376715	PCSK9
11	Non-cancer illness code, self-reported: high cholesterol || id:ukb-b-10912	Non-cancer illness code self-reported: chronic obstructive airways disease/copd || id:ukb-a-67	ukb-b-10912	ukb-a-67	337159	rs11621792	-0.00504559	0.00251328	0.0446885	NYNRIN
12	Non-cancer illness code, self-reported: high cholesterol || id:ukb-b-10912	Non-cancer illness code self-reported: chronic obstructive airways disease/copd || id:ukb-a-67	ukb-b-10912	ukb-a-67	337159	rs117733303	-0.00498533	0.00253502	0.0492315	LPAL2
13	Non-cancer illness code, self-reported: high cholesterol || id:ukb-b-10912	Non-cancer illness code self-reported: chronic obstructive airways disease/copd || id:ukb-a-67	ukb-b-10912	ukb-a-67	337159	rs11864054	-0.00532404	0.00251389	0.034188	BCL7C
14	Non-cancer illness code, self-reported: high cholesterol || id:ukb-b-10912	Non-cancer illness code self-reported: chronic obstructive airways disease/copd || id:ukb-a-67	ukb-b-10912	ukb-a-67	337159	rs11870057	-0.00536952	0.00251418	0.0327044	/
15	Non-cancer illness code, self-reported: high cholesterol || id:ukb-b-10912	Non-cancer illness code self-reported: chronic obstructive airways disease/copd || id:ukb-a-67	ukb-b-10912	ukb-a-67	337159	rs1216743	-0.00527425	0.0025132	0.0358505	ARHGAP42
16	Non-cancer illness code, self-reported: high cholesterol || id:ukb-b-10912	Non-cancer illness code self-reported: chronic obstructive airways disease/copd || id:ukb-a-67	ukb-b-10912	ukb-a-67	337159	rs1260326	-0.0051164	0.0025456	0.0444416	GCKR
17	Non-cancer illness code, self-reported: high cholesterol || id:ukb-b-10912	Non-cancer illness code self-reported: chronic obstructive airways disease/copd || id:ukb-a-67	ukb-b-10912	ukb-a-67	337159	rs12740374	-0.00441222	0.00260527	0.0903454	CELSR2
18	Non-cancer illness code, self-reported: high cholesterol || id:ukb-b-10912	Non-cancer illness code self-reported: chronic obstructive airways disease/copd || id:ukb-a-67	ukb-b-10912	ukb-a-67	337159	rs12916	-0.00557049	0.00254939	0.0288868	HMGCR
19	Non-cancer illness code, self-reported: high cholesterol || id:ukb-b-10912	Non-cancer illness code self-reported: chronic obstructive airways disease/copd || id:ukb-a-67	ukb-b-10912	ukb-a-67	337159	rs13179413	-0.00531947	0.00251279	0.0342635	C5orf67
20	Non-cancer illness code, self-reported: high cholesterol || id:ukb-b-10912	Non-cancer illness code self-reported: chronic obstructive airways disease/copd || id:ukb-a-67	ukb-b-10912	ukb-a-67	337159	rs13379043	-0.00528739	0.00251289	0.035369	MIDEAS
21	Non-cancer illness code, self-reported: high cholesterol || id:ukb-b-10912	Non-cancer illness code self-reported: chronic obstructive airways disease/copd || id:ukb-a-67	ukb-b-10912	ukb-a-67	337159	rs1367117	-0.00594383	0.00259097	0.0217873	APOB
22	Non-cancer illness code, self-reported: high cholesterol || id:ukb-b-10912	Non-cancer illness code self-reported: chronic obstructive airways disease/copd || id:ukb-a-67	ukb-b-10912	ukb-a-67	337159	rs140569782	-0.00543048	0.00251276	0.0306828	ELOA-AS1
23	Non-cancer illness code, self-reported: high cholesterol || id:ukb-b-10912	Non-cancer illness code self-reported: chronic obstructive airways disease/copd || id:ukb-a-67	ukb-b-10912	ukb-a-67	337159	rs141469619	-0.00507238	0.00251549	0.0437524	APOA1-AS
24	Non-cancer illness code, self-reported: high cholesterol || id:ukb-b-10912	Non-cancer illness code self-reported: chronic obstructive airways disease/copd || id:ukb-a-67	ukb-b-10912	ukb-a-67	337159	rs1471741	-0.00553088	0.00251496	0.0278644	STAG1
25	Non-cancer illness code, self-reported: high cholesterol || id:ukb-b-10912	Non-cancer illness code self-reported: chronic obstructive airways disease/copd || id:ukb-a-67	ukb-b-10912	ukb-a-67	337159	rs1569447	-0.00534469	0.00251642	0.0336761	/
26	Non-cancer illness code, self-reported: high cholesterol || id:ukb-b-10912	Non-cancer illness code self-reported: chronic obstructive airways disease/copd || id:ukb-a-67	ukb-b-10912	ukb-a-67	337159	rs1584063	-0.00519399	0.00251555	0.0389465	/
27	Non-cancer illness code, self-reported: high cholesterol || id:ukb-b-10912	Non-cancer illness code self-reported: chronic obstructive airways disease/copd || id:ukb-a-67	ukb-b-10912	ukb-a-67	337159	rs16926246	-0.00533781	0.00251332	0.033686	HK1
28	Non-cancer illness code, self-reported: high cholesterol || id:ukb-b-10912	Non-cancer illness code self-reported: chronic obstructive airways disease/copd || id:ukb-a-67	ukb-b-10912	ukb-a-67	337159	rs17681684	-0.00547234	0.00251344	0.0294631	GLP2R
29	Non-cancer illness code, self-reported: high cholesterol || id:ukb-b-10912	Non-cancer illness code self-reported: chronic obstructive airways disease/copd || id:ukb-a-67	ukb-b-10912	ukb-a-67	337159	rs1883025	-0.00548944	0.00251779	0.0292381	ABCA1
30	Non-cancer illness code, self-reported: high cholesterol || id:ukb-b-10912	Non-cancer illness code self-reported: chronic obstructive airways disease/copd || id:ukb-a-67	ukb-b-10912	ukb-a-67	337159	rs193084249	-0.00523389	0.00251403	0.0373542	/
31	Non-cancer illness code, self-reported: high cholesterol || id:ukb-b-10912	Non-cancer illness code self-reported: chronic obstructive airways disease/copd || id:ukb-a-67	ukb-b-10912	ukb-a-67	337159	rs2068888	-0.00482016	0.00251547	0.0553386	/
32	Non-cancer illness code, self-reported: high cholesterol || id:ukb-b-10912	Non-cancer illness code self-reported: chronic obstructive airways disease/copd || id:ukb-a-67	ukb-b-10912	ukb-a-67	337159	rs2125345	-0.00529753	0.00251366	0.0350745	UNK/MIR4738
33	Non-cancer illness code, self-reported: high cholesterol || id:ukb-b-10912	Non-cancer illness code self-reported: chronic obstructive airways disease/copd || id:ukb-a-67	ukb-b-10912	ukb-a-67	337159	rs2140046	-0.00517187	0.0025127	0.0395619	NOSTRIN
34	Non-cancer illness code, self-reported: high cholesterol || id:ukb-b-10912	Non-cancer illness code self-reported: chronic obstructive airways disease/copd || id:ukb-a-67	ukb-b-10912	ukb-a-67	337159	rs2244608	-0.00530026	0.00252204	0.0355906	HNF1A
35	Non-cancer illness code, self-reported: high cholesterol || id:ukb-b-10912	Non-cancer illness code self-reported: chronic obstructive airways disease/copd || id:ukb-a-67	ukb-b-10912	ukb-a-67	337159	rs2618567	-0.00526296	0.00251573	0.0364366	/
36	Non-cancer illness code, self-reported: high cholesterol || id:ukb-b-10912	Non-cancer illness code self-reported: chronic obstructive airways disease/copd || id:ukb-a-67	ukb-b-10912	ukb-a-67	337159	rs2721961	-0.00548439	0.00251328	0.0290976	TRPS1
37	Non-cancer illness code, self-reported: high cholesterol || id:ukb-b-10912	Non-cancer illness code self-reported: chronic obstructive airways disease/copd || id:ukb-a-67	ukb-b-10912	ukb-a-67	337159	rs2738447	-0.00491151	0.00253511	0.0526969	LDLR
38	Non-cancer illness code, self-reported: high cholesterol || id:ukb-b-10912	Non-cancer illness code self-reported: chronic obstructive airways disease/copd || id:ukb-a-67	ukb-b-10912	ukb-a-67	337159	rs28615248	-0.00525438	0.00251552	0.0367273	/
39	Non-cancer illness code, self-reported: high cholesterol || id:ukb-b-10912	Non-cancer illness code self-reported: chronic obstructive airways disease/copd || id:ukb-a-67	ukb-b-10912	ukb-a-67	337159	rs28807203	-0.00460801	0.00251545	0.0669688	CEACAM19
40	Non-cancer illness code, self-reported: high cholesterol || id:ukb-b-10912	Non-cancer illness code self-reported: chronic obstructive airways disease/copd || id:ukb-a-67	ukb-b-10912	ukb-a-67	337159	rs2972145	-0.00511169	0.00251677	0.0422498	/
41	Non-cancer illness code, self-reported: high cholesterol || id:ukb-b-10912	Non-cancer illness code self-reported: chronic obstructive airways disease/copd || id:ukb-a-67	ukb-b-10912	ukb-a-67	337159	rs3127580	-0.00534897	0.00252039	0.0338141	/
42	Non-cancer illness code, self-reported: high cholesterol || id:ukb-b-10912	Non-cancer illness code self-reported: chronic obstructive airways disease/copd || id:ukb-a-67	ukb-b-10912	ukb-a-67	337159	rs34631598	-0.00523342	0.00251313	0.0373026	DENND4C
43	Non-cancer illness code, self-reported: high cholesterol || id:ukb-b-10912	Non-cancer illness code self-reported: chronic obstructive airways disease/copd || id:ukb-a-67	ukb-b-10912	ukb-a-67	337159	rs34707604	-0.00542735	0.00251632	0.0310164	/
44	Non-cancer illness code, self-reported: high cholesterol || id:ukb-b-10912	Non-cancer illness code self-reported: chronic obstructive airways disease/copd || id:ukb-a-67	ukb-b-10912	ukb-a-67	337159	rs3918226	-0.00526067	0.00251387	0.0363794	NOS3
45	Non-cancer illness code, self-reported: high cholesterol || id:ukb-b-10912	Non-cancer illness code self-reported: chronic obstructive airways disease/copd || id:ukb-a-67	ukb-b-10912	ukb-a-67	337159	rs4299376	-0.00500358	0.00254899	0.0496499	ABCG8/LOC102725159
46	Non-cancer illness code, self-reported: high cholesterol || id:ukb-b-10912	Non-cancer illness code self-reported: chronic obstructive airways disease/copd || id:ukb-a-67	ukb-b-10912	ukb-a-67	337159	rs456598	-0.00509494	0.00251577	0.0428468	LOC124901452
47	Non-cancer illness code, self-reported: high cholesterol || id:ukb-b-10912	Non-cancer illness code self-reported: chronic obstructive airways disease/copd || id:ukb-a-67	ukb-b-10912	ukb-a-67	337159	rs4921914	-0.00521668	0.00252042	0.0384741	/
48	Non-cancer illness code, self-reported: high cholesterol || id:ukb-b-10912	Non-cancer illness code self-reported: chronic obstructive airways disease/copd || id:ukb-a-67	ukb-b-10912	ukb-a-67	337159	rs507666	-0.00551167	0.00253032	0.0293872	ABO
49	Non-cancer illness code, self-reported: high cholesterol || id:ukb-b-10912	Non-cancer illness code self-reported: chronic obstructive airways disease/copd || id:ukb-a-67	ukb-b-10912	ukb-a-67	337159	rs556107	-0.00515145	0.00251871	0.0408283	LOC124904556
50	Non-cancer illness code, self-reported: high cholesterol || id:ukb-b-10912	Non-cancer illness code self-reported: chronic obstructive airways disease/copd || id:ukb-a-67	ukb-b-10912	ukb-a-67	337159	rs58542926	-0.00546517	0.00252796	0.030627	TM6SF2
51	Non-cancer illness code, self-reported: high cholesterol || id:ukb-b-10912	Non-cancer illness code self-reported: chronic obstructive airways disease/copd || id:ukb-a-67	ukb-b-10912	ukb-a-67	337159	rs59950280	-0.00532694	0.00251845	0.0344158	/
52	Non-cancer illness code, self-reported: high cholesterol || id:ukb-b-10912	Non-cancer illness code self-reported: chronic obstructive airways disease/copd || id:ukb-a-67	ukb-b-10912	ukb-a-67	337159	rs6090040	-0.0054964	0.00251875	0.0290954	TCEA2
53	Non-cancer illness code, self-reported: high cholesterol || id:ukb-b-10912	Non-cancer illness code self-reported: chronic obstructive airways disease/copd || id:ukb-a-67	ukb-b-10912	ukb-a-67	337159	rs6093446	-0.00527023	0.00251454	0.0360905	PLCG1
54	Non-cancer illness code, self-reported: high cholesterol || id:ukb-b-10912	Non-cancer illness code self-reported: chronic obstructive airways disease/copd || id:ukb-a-67	ukb-b-10912	ukb-a-67	337159	rs622871	-0.00507031	0.00251781	0.0440331	C2
55	Non-cancer illness code, self-reported: high cholesterol || id:ukb-b-10912	Non-cancer illness code self-reported: chronic obstructive airways disease/copd || id:ukb-a-67	ukb-b-10912	ukb-a-67	337159	rs639750	-0.00508451	0.00251978	0.043608	PCSK9
56	Non-cancer illness code, self-reported: high cholesterol || id:ukb-b-10912	Non-cancer illness code self-reported: chronic obstructive airways disease/copd || id:ukb-a-67	ukb-b-10912	ukb-a-67	337159	rs6511720	-0.00467998	0.00262445	0.0745504	LDLR/LDLR-AS1
57	Non-cancer illness code, self-reported: high cholesterol || id:ukb-b-10912	Non-cancer illness code self-reported: chronic obstructive airways disease/copd || id:ukb-a-67	ukb-b-10912	ukb-a-67	337159	rs6737490	-0.00535779	0.00251263	0.0329784	/
58	Non-cancer illness code, self-reported: high cholesterol || id:ukb-b-10912	Non-cancer illness code self-reported: chronic obstructive airways disease/copd || id:ukb-a-67	ukb-b-10912	ukb-a-67	337159	rs679582	-0.00507891	0.00251547	0.0434799	/
59	Non-cancer illness code, self-reported: high cholesterol || id:ukb-b-10912	Non-cancer illness code self-reported: chronic obstructive airways disease/copd || id:ukb-a-67	ukb-b-10912	ukb-a-67	337159	rs6882076	-0.00544547	0.00252478	0.0310208	TIMD4
60	Non-cancer illness code, self-reported: high cholesterol || id:ukb-b-10912	Non-cancer illness code self-reported: chronic obstructive airways disease/copd || id:ukb-a-67	ukb-b-10912	ukb-a-67	337159	rs6905288	-0.00511568	0.00251695	0.0421042	POLR1C
61	Non-cancer illness code, self-reported: high cholesterol || id:ukb-b-10912	Non-cancer illness code self-reported: chronic obstructive airways disease/copd || id:ukb-a-67	ukb-b-10912	ukb-a-67	337159	rs7012637	-0.00550551	0.00251444	0.028556	/
62	Non-cancer illness code, self-reported: high cholesterol || id:ukb-b-10912	Non-cancer illness code self-reported: chronic obstructive airways disease/copd || id:ukb-a-67	ukb-b-10912	ukb-a-67	337159	rs7140110	-0.00501221	0.00251278	0.0460769	GAS6/GAS6-AS1
63	Non-cancer illness code, self-reported: high cholesterol || id:ukb-b-10912	Non-cancer illness code self-reported: chronic obstructive airways disease/copd || id:ukb-a-67	ukb-b-10912	ukb-a-67	337159	rs7412	-0.00356942	0.00270171	0.186445	APOE
64	Non-cancer illness code, self-reported: high cholesterol || id:ukb-b-10912	Non-cancer illness code self-reported: chronic obstructive airways disease/copd || id:ukb-a-67	ukb-b-10912	ukb-a-67	337159	rs76895963	-0.00527922	0.00251297	0.0356597	CCND2-AS1
65	Non-cancer illness code, self-reported: high cholesterol || id:ukb-b-10912	Non-cancer illness code self-reported: chronic obstructive airways disease/copd || id:ukb-a-67	ukb-b-10912	ukb-a-67	337159	rs7707394	-0.00538344	0.00251886	0.0325774	ANKRD31
66	Non-cancer illness code, self-reported: high cholesterol || id:ukb-b-10912	Non-cancer illness code self-reported: chronic obstructive airways disease/copd || id:ukb-a-67	ukb-b-10912	ukb-a-67	337159	rs77542162	-0.00539277	0.00252731	0.0328595	ABCA6
67	Non-cancer illness code, self-reported: high cholesterol || id:ukb-b-10912	Non-cancer illness code self-reported: chronic obstructive airways disease/copd || id:ukb-a-67	ukb-b-10912	ukb-a-67	337159	rs7903146	-0.00528607	0.00251428	0.0355162	TCF7L2
68	Non-cancer illness code, self-reported: high cholesterol || id:ukb-b-10912	Non-cancer illness code self-reported: chronic obstructive airways disease/copd || id:ukb-a-67	ukb-b-10912	ukb-a-67	337159	rs799157	-0.00542117	0.00251539	0.0311464	MLXIPL
69	Non-cancer illness code, self-reported: high cholesterol || id:ukb-b-10912	Non-cancer illness code self-reported: chronic obstructive airways disease/copd || id:ukb-a-67	ukb-b-10912	ukb-a-67	337159	rs8090363	-0.00533682	0.00251414	0.033777	/
70	Non-cancer illness code, self-reported: high cholesterol || id:ukb-b-10912	Non-cancer illness code self-reported: chronic obstructive airways disease/copd || id:ukb-a-67	ukb-b-10912	ukb-a-67	337159	rs9385717	-0.0049445	0.0025128	0.0490997	/
71	Non-cancer illness code, self-reported: high cholesterol || id:ukb-b-10912	Non-cancer illness code self-reported: chronic obstructive airways disease/copd || id:ukb-a-67	ukb-b-10912	ukb-a-67	337159	rs9442198	-0.00547565	0.00251265	0.0293145	FAM131C
72	Non-cancer illness code, self-reported: high cholesterol || id:ukb-b-10912	Non-cancer illness code self-reported: chronic obstructive airways disease/copd || id:ukb-a-67	ukb-b-10912	ukb-a-67	337159	All	-0.00521369	0.00250742	0.0375894
